# Supplementary material for: Clinical Recommendations to Manage Gastrointestinal Adverse Events in Patients Treated with Glp-1 Receptor Agonists: A Multidisciplinary Expert Consensus
Source: MDPI journal article supplement (doi:10.3390/jcm12010145), 2022-12-24
Supplement: s1 [file s1]

**Supplementary Table S1. Characteristics of the currently commercialized GLP-1 RAs with indications for T2D or obesity**

| Active ingredient        | Trade name | Indication                                                                                                                                                                                                                                                                                                                                         | RD (mg)       | Administration | Posology    |
|--------------------------|------------|----------------------------------------------------------------------------------------------------------------------------------------------------------------------------------------------------------------------------------------------------------------------------------------------------------------------------------------------------|---------------|----------------|-------------|
| Semaglutide <sup>1</sup> | Ozempic®   | Adults with insufficiently controlled T2D as an adjunct to diet and exercise<br><ul style="list-style-type: none"> <li>• as monotherapy if metformin is inappropriate due to intolerance or contraindications</li> <li>• in addition to other medicinal products for the treatment of diabetes</li> </ul>                                          | 0.5, 1.0, 2.0 | s.c.           | Once weekly |
| Semaglutide <sup>2</sup> | Rybelsus®  | Adults with insufficiently controlled T2D as an adjunct to diet and exercise<br><ul style="list-style-type: none"> <li>• as monotherapy if metformin is inappropriate due to intolerance or contraindications</li> <li>• in addition to other medicinal products for the treatment of diabetes</li> </ul>                                          | 7, 14         | p.o.           | QD          |
| Semaglutide <sup>3</sup> | Wegovy®    | Adults with BMI $\geq 30$ kg/m <sup>2</sup> or $\geq 27$ kg/m <sup>2</sup> to $< 30$ kg/m <sup>2</sup> and $\geq 1$ weight-related comorbidity* as an adjunct to diet and exercise                                                                                                                                                                 | 2.4           | s.c.           | Once weekly |
| Liraglutide <sup>4</sup> | Victoza®   | Adults, adolescents and $\geq 10$ y.o. children with insufficiently controlled T2D as an adjunct to diet and exercise<br><ul style="list-style-type: none"> <li>• as monotherapy if metformin is inappropriate due to intolerance or contraindications</li> <li>• in addition to other medicinal products for the treatment of diabetes</li> </ul> | 1.2, 1.8      | s.c.           | QD          |
| Liraglutide <sup>5</sup> | Saxenda®   | Adults with BMI $\geq 30$ kg/m <sup>2</sup> or $\geq 27$ kg/m <sup>2</sup> to $< 30$ kg/m <sup>2</sup> and $\geq 1$ weight-related comorbidity† as an adjunct to diet and exercise<br>Adolescents ( $\geq 12$ y.o.) with BMI corresponding to $\geq 30$ kg/m <sup>2</sup> for adults by IOTF BMI cut-off points and body weight $> 60$ kg          | 3             | s.c.           | QD          |
| Dulaglutide <sup>6</sup> | Trulicity® | Adults with insufficiently controlled T2D as an adjunct to diet and exercise<br><ul style="list-style-type: none"> <li>• as monotherapy if metformin is inappropriate due to intolerance or contraindications</li> <li>• in addition to other medicinal products for the treatment of diabetes</li> </ul>                                          | 0.75‡<br>1.5§ | s.c.           | Once weekly |

|                           |           |                                                                                                                                                                                                                                                                                                                                                                                                                                                                                                             |       |      |             |
|---------------------------|-----------|-------------------------------------------------------------------------------------------------------------------------------------------------------------------------------------------------------------------------------------------------------------------------------------------------------------------------------------------------------------------------------------------------------------------------------------------------------------------------------------------------------------|-------|------|-------------|
| Exenatide <sup>7</sup>    | Bydureon® | ≥18 y.o. adults with T2D in combination with other glucose-lowering medicinal products including basal insulin, when the therapy in use, together with diet and exercise, does not provide adequate glycaemic control.                                                                                                                                                                                                                                                                                      | 2     | s.c. | Once weekly |
| Exenatide <sup>8</sup>    | Byetta®   | <ul style="list-style-type: none"> <li>• Adults with T2D in combination with: metformin; sulphonylureas; thiazolidinediones; metformin and a sulphonylurea; metformin and a thiazolidinedione, when adequate glycaemic control has not been achieved on maximally tolerated doses of these therapies</li> <li>• Adults with T2D, as adjunctive therapy to basal insulin with or without metformin and/or pioglitazone when adequate glycaemic control has not been achieved with such treatments</li> </ul> | 0.010 | s.c. | BID         |
| Lixisenatide <sup>9</sup> | Lyxumia®  | Adults with T2D in combination with oral glucose-lowering medicinal products and/or basal insulin when these, together, with diet and exercise, do not provide adequate glycaemic control                                                                                                                                                                                                                                                                                                                   | 0.020 | s.c. | QD          |

1. [https://www.ema.europa.eu/en/documents/product-information/ozempic-epar-product-information\\_en.pdf](https://www.ema.europa.eu/en/documents/product-information/ozempic-epar-product-information_en.pdf)

2. [https://www.ema.europa.eu/en/documents/product-information/rybelsus-epar-product-information\\_en.pdf](https://www.ema.europa.eu/en/documents/product-information/rybelsus-epar-product-information_en.pdf)

3. [https://www.ema.europa.eu/en/documents/product-information/wegovy-epar-product-information\\_en.pdf](https://www.ema.europa.eu/en/documents/product-information/wegovy-epar-product-information_en.pdf)

4. [https://www.ema.europa.eu/en/documents/product-information/victoza-epar-product-information\\_en.pdf](https://www.ema.europa.eu/en/documents/product-information/victoza-epar-product-information_en.pdf)

5. [https://www.ema.europa.eu/en/documents/product-information/saxenda-epar-product-information\\_en.pdf](https://www.ema.europa.eu/en/documents/product-information/saxenda-epar-product-information_en.pdf)

6. [https://www.ema.europa.eu/en/documents/product-information/trulicity-epar-product-information\\_en.pdf](https://www.ema.europa.eu/en/documents/product-information/trulicity-epar-product-information_en.pdf)

7. [https://www.ema.europa.eu/en/documents/product-information/bydureon-epar-product-information\\_en.pdf](https://www.ema.europa.eu/en/documents/product-information/bydureon-epar-product-information_en.pdf)

8. [https://www.ema.europa.eu/en/documents/product-information/byetta-epar-product-information\\_en.pdf](https://www.ema.europa.eu/en/documents/product-information/byetta-epar-product-information_en.pdf)

9. [https://www.ema.europa.eu/en/documents/product-information/lyxumia-epar-product-information\\_en.pdf](https://www.ema.europa.eu/en/documents/product-information/lyxumia-epar-product-information_en.pdf)

\*Prediabetes or T2D, hypertension, dyslipidaemia, obstructive sleep apnoea or cardiovascular disease. †Prediabetes or T2D, hypertension, dyslipidaemia, obstructive sleep apnoea. ‡Monotherapy. §Add-on therapy. BID, twice a day; BMI, body mass index; GLP-1 RA, GLP-1 receptor agonist; IOTF, International Obesity Task Force; p.o., oral; s.c., subcutaneous; QD, once a day; RD, recommended dose; T2D, type 2 diabetes mellitus; y.o., years old.

**Supplementary Table S2. Combinations of keywords used to perform a literature search in the PubMed database regarding management of AEs associated with GLP-1 RA use**

| <b>Keyword combination</b>                                                 | <b>Retrieved results (n)</b> |
|----------------------------------------------------------------------------|------------------------------|
| Glucagon-Like Peptide-1 receptor agonist*[Title] and practic*[Title]       | 1                            |
| Glucagon-Like Peptide-1 receptor agonist*[Title] and manag*[Title]         | 0                            |
| Glucagon-Like Peptide-1 receptor agonist*[Title] and adverse event*[Title] | 0                            |
| Glucagon-Like Peptide-1 receptor agonist*[Title] and safe*[Title]          | 28                           |
| Glucagon-Like Peptide-1 receptor agonist*[Title] and real-world[Title]     | 22                           |
| GLP-1 receptor agonist*[Title] and practic*[Title]                         | 0                            |
| GLP-1 receptor agonist*[Title] and manag*[Title]                           | 0                            |
| GLP-1 receptor agonist*[Title] and adverse event*[Title]                   | 0                            |
| GLP-1 receptor agonist*[Title] and safe*[Title]                            | 18                           |
| GLP-1 receptor agonist*[Title] and real-world[Title]                       | 6                            |
| Semaglutide[Title] and practic*[Title]                                     | 0                            |
| Semaglutide[Title] and manag*[Title]                                       | 0                            |
| Semaglutide[Title] and adverse event*[Title]                               | 0                            |
| Semaglutide[Title] and safe*[Title]                                        | 36                           |
| Semaglutide[Title] and real-world[Title]                                   | 17                           |
| Semaglutide[Title] and SUSTAIN[Title]                                      | 36                           |
| Semaglutide[Title] and STEP[Title]                                         | 9                            |
| Semaglutide[Title] and PIONEER[Title]                                      | 31                           |
| Liraglutide[Title] and practic*[Title]                                     | 0                            |
| Liraglutide[Title] and manag*[Title]                                       | 0                            |
| Liraglutide[Title] and adverse event*[Title]                               | 1                            |
| Liraglutide[Title] and safe*[Title]                                        | 60                           |
| Liraglutide[Title] and real-world[Title]                                   | 52                           |
| Liraglutide[Title] and LEAD[Title]                                         | 16                           |
| Liraglutide[Title] and SCALE[Title]                                        | 13                           |
| Dulaglutide[Title] and practic*[Title]                                     | 0                            |
| Dulaglutide[Title] and manag*[Title]                                       | 0                            |
| Dulaglutide[Title] and adverse event*[Title]                               | 0                            |
| Dulaglutide[Title] and safe*[Title]                                        | 41                           |
| Dulaglutide[Title] and real-world[Title]                                   | 21                           |
| Dulaglutide[Title] and AWARD[Title]                                        | 41                           |
| Exenatide[Title] and practic*[Title]                                       | 0                            |
| Exenatide[Title] and manag*[Title]                                         | 0                            |
| Exenatide[Title] and adverse event*[Title]                                 | 1                            |
| Exenatide[Title] and safe*[Title]                                          | 38                           |
| Exenatide[Title] and real-world[Title]                                     | 18                           |

|                                               |    |
|-----------------------------------------------|----|
| Exenatide[Title] and DURATION[Title]          | 29 |
| Lixisenatide[Title] and practic*[Title]       | 0  |
| Lixisenatide[Title] and manag*[Title]         | 0  |
| Lixisenatide[Title] and adverse event*[Title] | 0  |
| Lixisenatide[Title] and safe*[Title]          | 33 |
| Lixisenatide[Title] and real-world[Title]     | 5  |
| Lixisenatide[Title] and GETGOAL[Title]        | 23 |

AEs, adverse events; GLP-1 RA, glucagon-like peptide-1 receptor agonist.
